# Supplementary material
Source: PubMed Central journal article supplement (PMC1450207)
Supplement: pnas_0600833103_4.pdf [file pnas_0600833103_4.pdf]

10 20 30 40 50 60 70 80 90 100 110 120 130 140

**W1**

ATP-1\_CB -----MKSDFTDYSIQNYYSKRNNNPLLPSSL-RACITCKSCCGKTNLIMNLLDDEYCEDYDYDNLIFYF-----STTLFPCY---QALINGFANGDSSKKEIRECF 94  
 ATP-1\_CC -----MKNLRAQLPVINFDQIQVQGTGVKLRHGALLPNSIHAIVFCPSNCGKTNALSLIIVHP-----NCRUFENI---LYL-----SKSLNPKY---QFLET-LLKQIDGEGFFTF 98  
 ATP-2\_TC MCKVFLFVFKSMLKLVQKDLIKISNHDYSVCVPYQHFPKHNFLFNNSVGRGLVVRSCGKTNVILSLIHLHP-----NRURFT--DIYLE-----SKTLQPKY---QFLKS-VLAPDKVGYEYE 113  
 ATP-2\_NV -----MDIPNYSNTGANKKYQLCKFMPSDNF-RLLISCPSPGSGKTNCLIHMLVTP-----LHFDKIYLY-----AKNLESKY---QDLIHTFSDISHEVGYSVIE 90  
 ATP-1\_CI -----MDVSVFKHPF-TMLITCPTGSGKSVFVKELIANA-----NVMLNQPPEKIIV-----AYGVWQFY---DTIT-----NVTFVE----- 64  
 ATP-1\_SP -----MTVVFVHPF-TCMVAQPTGSGKTVFVRKLLKYN-----QDLIEKPPQKILW-----CYGVYKAY---TEMM---AEVPTIEFIE----- 68  
 ATP-1\_TC -----MDLRFKSPF-TAIVACPTACGKTHFIRFKHL-----SLICDTEFEFVRLW-----FYDEWFLY---QNMNDINNLQRFEFQ----- 70  
 ATP-1\_XT -----MDTRLQHPF-SCILACPSNCKSYFVKQLIVNA-----DMLLSHKPDNIIVW-----FYACWOKLY---DELSS---SFPHFIE----- 68  
 ATP-2\_DR -----MGFDNVFGHGQVQDAGVDFRFQHPF-TCHISCPSSGKTFVVKMLLQNC-----EPLMFSKNVENVIR-----VYNSWFLY---DDL-----KMYDKFKIK----- 84  
 ATP-1\_NV -----MEDRRFRPCPC-AIMVVCPSGKTTWVQSLLRQA-----PKAFDKRFHKILC-----CYGQWPKY---DWMQKKL-----GVEFHQ----- 68  
 ATP-3\_CR -----MVKLSWQS-TLLIVCPSGKSTLARQIVEQR-----NTLFDVDSKICF-----WYDTEFSV-----PDSMKNRPDMLR----- 65  
 ATP-1\_CR -----MFDQKTKMTPQFRFPS-QTTVICATCSGKTSIVRKILENL-----DSSFSTNIDNIF-----WFGVD-----NDGIPKHIPQITCIE----- 73  
 AAL73466 -----MESQFDKTIQVENLNKQDS-SILIAQRRSGKTVLCINLLLY-----ITEKYSYQSII-----LSDTGGIETNSAFDIDKNFIFESR 80  
 AAL69857 -----MNRFKKEHFFRSLNKSFP-RALVCGSGGKTMVLSLFSST-----LIDKYKHIFLE-----PVYNEAYDSIWPDHVNVKVTSEDEYSLVTTKQ 87  
 CAE52735 -----MDIVREKFNRLNLDYF-RMVLICGSGGKTTFLSLFKT-----FITKYKHIFLE-----PILNPSYNYWVPDHIYKITTAELEYSLSKMKQ 87  
 YP\_031593 -----MEQVPIKEMRLSDLRPNKSIDTDLGGT-KLVVILCKPSSGKSTLTKALDS-----KRHFIPCAVVI-----SGSEANFYKGVVPDFL 79  
 NP\_078656 -----MDSVNIQLDLDLRPNKSEMETDIGGM-KLTIICRPSGKSVIKSLIAS-----KRYDIPAAVVI-----SGSEANHFYKTIIPSCF 79  
 AAP74205 -----MILKELSLTELRFKPPDEMGGKLLVILCKPQKGVKSLKSLIAA-----KRHFIPAAVVI-----SGSEANHFYKSLLENPCF 74  
 NP\_048749 -----MSYSITQSPRSIKDGA-IVGVVCRSGKSVIKSLIYY-----KRNALPIGLMI-----SGTEAGNGY-----FSSYVPEIFVVDFF 72  
 NP\_077388 -----VNDIYNTAIKYQKTVNFAHAMLTNGCMKSLNYGIQPF-IVIVYVCPGSGKSOFTRNLISSR-----LIEPSPETIEFITPEKGTVPLEEKVAEHAHCAEAGNDAQGNPLTTKLNPTFILPFKDAV 120

**W2**

ATP-1\_CB RTQNFVVDKKNKEISLHISEN---CDDIPDPSSIDPN-RKTLIIFDDLMLEK---QNK---TEQYIT-RGRNNDQCFYISNYIKLKP---NTIREANFIVFSQDK-MNL---EYTYRD-HCGEVDR-PTFLEWVT 214  
 ATP-1\_CC EHEAVI---KP-----EDAKPNSLMIFFDVACEK---QDH---IKAFPC-MGRKVDSEFYLCITYTRIPK---HLIRDNANFVLVFERODEMNLKHYD---DHNVTDMYNSFRDICS 196  
 ATP-2\_TC DGAEI---EP-----PKEIKPYSIIFDDVVIC---NQNI---IRDYFC-FGRNNDQCFYISNYIKLKP---OLIRDNANFVLVFERODEMNLKHYD---DHNVTDMYNSFRDICS 211  
 ATP-2\_NV CSSDDV---TPV-----GELDDETQKIIIFDDVEYCEK---NQAP---HIDYFI-RGRNNDQCFYISNYIKLKP---DVRNCSHFVYDFPSTNERGIT---RELGVSKEQYS 185  
 ATP-1\_CI -----GVPEVBS-----FDGK-QRVLIVDDLMGD---SNSK---LTDFTFSSHILNLSVIFIVNLFYKN---QTHISLNAHYITAFKNPR-CATQATLAQWYPGK--T-NFLKAAFA 162  
 ATP-1\_SP -----GPPSSFD-----GVIDPN-LRNLIIIVDDLMAECT---KDNM---MTEFTFSGSHRNLSVIFIVNLFHAGRETRTISLNAQYLVIVYKNPR-DKSOITHLGROYPGQ--T-KYVQEAYN 172  
 ATP-1\_TC -----GVPDINE-----FDG-V-KATLIIIDDLRE---ANGS---VDFEFTGSHRNLSVFNITNLFYQCKGORDISLNAQYLVIVYKNPR-DKAOINFLARQEPEN--I-KFVQESYK 170  
 ATP-1\_XT -----GLPQTFM-----DDDLFPPGKVMIIIVDDLMESAS---ENVE---EKAFTKYVHARNLSIMVIVNVEFCQKKSRTINLNTKYMVLKFNPR-DKLOITLISROMYPGK--T-RFFLEAF 174  
 ATP-2\_DR -----GLPESFD-----DDHLFPP-E-KTNLIIIDDLMECS---NNLE---VSRVFTQYSHKNNSKKIVNLFYQCKKSRTISLNAQYLVIVYKNPR-DSGQNVVIAQWYFAGN--T-KFFMECYH 190  
 ATP-1\_NV -----GLPDSVT-----ELFGKHDTPGLIIIDDLMDQID---R---ALKFTQESHHDITTFISLTPFPGGR-SRTASINSHFFVMEFDRPR-NKLGRTLAQWYFAGN--LDYVMDAYD 169  
 ATP-3\_CR -----EGLPNIEE-----LKKYKQDQAMVVIDDLMKID---QMSG---MERIVSVLAHYDMVIFLHTIFY-SKVIINLQOASYIILPKNNA-DKSSVRCIGSMPG---ACNTFLAAYN 169  
 ATP-1\_CR -----GLPDEVF-----LKQHRFKNNIIVDDLMNIFA---RDKKSLHLNDFLFCVYAHYVCAIFNLSAFALPPT---TNNSTYLLMLNLS-DASQKNLLOQFGEK---WRGALKAYQ 178  
 AAL73466 -----QLDEI---IPKLMKY---EKEKKKRNQKYMIIIVDDINLKN---RSKL---LDDLYS-KSRNINMVIIVVYSKIV---ITNIRSNIDILEMSQNNSGLESMEYCIN---TELDKREFYRIFRE 189  
 AAL69857 -----KIEKYI---ESKGTKNADMFLIIIDDMGDQKT---RSSC---LDDLLN-HGRNLSIITLCCITYKHVAVNG---RTSITHFCCCNVSDSDIENMLRSM---IVGSKDLLKSIISM 190  
 CAE52735 -----DLVNL-----GKRSINHKFVLIIDDLGDMQL---KSKI---LSDLVN-TGRIRMSIVMLCCITYRHVPS---NCRSSITHCCCNVSDADIENTRSM---LVATKQIKALSV 186  
 YP\_031593 -----IYHQF-----SPSIEDRERROVKAKAEMGSKSWLLVVIDDCMNAKMFENDE---VRALEK-NGRNINLVVIVIANQYVMDL---TPDLRASSVDGVELEFENNVTYRDKTYANF---ASVVEPKKIYPTM 195  
 NP\_078656 -----IYNKF-----NDSIEKLEKROITAKNIGL-KTSWLLIIDDCCMDSKLFCEKT---VMDLEK-NGRNINLVVIVIANQYVMDL---KPVIRATIDGVELEFENNVTYRDKTYANF---FASIPKKEFFILM 194  
 AAP74205 -----VYNKF-----DADIITRVKORQALAKNV-DPEHSMLLIEDDCMNAKMFENHEA---VMDLEK-NGRNINLVVIVIANQYVMDLNA---SLRCCIDGVELEFTE---TSQTCVDKIYKQ-FGGNIPKQTFILM 189  
 NP\_048749 -----NKD-----GLEKLEROK---KAACKGMSKVFVVIDDLAFDTSIMKQPV---MRYLFM-NGRNINLVVIVIANQYVADLG---PPAIFANIDILLVCEAIQANRWLYN---MFFGCFESFEDFNKVL 183  
 NP\_077388 -----SDINL-----NDNPNENI---FCKAASNGPICVMDCCMFLGSCHS---ISSEF---HALPSKI---SDFPKCSGYTVIVVILHNMNPRHNRGNIKDLKIKOSKCHVISPOLLEISOV 223

290 300 310 320 330 340 350 360 370 380 390 400

ATP-1\_CB -----EIKWCKNFFTIIDKTSDS-----DNGKFKK-----MLKYFFVL----- 247  
 ATP-1\_CC -----ACWKKYGFVVIDKDSLE-----KSGRMKRG-----FYCFISIN----- 229  
 ATP-2\_TC -----QCWQKPYGFVVIDKDAEQ-----DNGRYRNG-----FDQFIKI----- 244  
 ATP-2\_NV -----KVSQKPYGFVIVKSPDKKI-----AFN-----FYGRV----- 212  
 ATP-1\_CI -----DATKRAYGYLLIDFRQATD-----ERLRIRTR-----FPGEIQ-DVYLPVY----- 203  
 ATP-1\_SP -----DATKNPYGYLLIDLKANTL-----ESHRLRTH-----LFPNEFT-TVVVPK----- 213  
 ATP-1\_TC -----DATMRPYGYLLIDLKQNTPE-----DDFRIRTN-----LDPDEPCYVYIPKKNYKYSK----- 219  
 ATP-1\_XT -----DATSOPYGYLLIDLRSNTP-----BELRRTG-----LPPPSLP-AVYVVKKCSK----- 220  
 ATP-2\_DR -----DATSIPYGYLLIDYKAHTP-----DQYRRTA-----VLSDRPYYVILQKR----- 231  
 ATP-1\_NV -----QATKRPYSCLLIDFHQKTP-----DNLRLRSD-----LDPDEFMYAFFPNRSGEAYIEGEEGGNTSVNDAQRKRKRSGGWVDDPYTTHGKRKARSRVHPRQVCG 268  
 ATP-3\_CR -----DATSOPYGYLLIDLHKNPC-----DEIRYRDN-----LPLGKIT-HVFIPK----- 209  
 ATP-1\_CR -----SVMSKPYNAMMINNDPNAD-----PCFRIMEN-----FLHEFFIIVYK----- 215  
 AAL73466 -----NTINNOYVYVILHDNVNKL-----KIVKADFFQLENKGGKQKIKL----- 230  
 AAL69857 -----SSIAGRRRVLIIDDSVFSF-----GEQRICFD-----SADEHVINNDVNPILLKQFHMKNLPLKILLSYE----- 252  
 CAE52735 -----RAASRGKVVYIENNTVFAN-----KDRIICYD-----TADGKSVIEQKPDATLLSDFSHMCKQLHTLSDDNKDTYFDLSNLSINDDRDKKDCIYSPEREASSNMALKYSKQESLOEL 299  
 YP\_031593 -----ETVCOROMFIDNTKATDMHDSVFWYKAPYSKSAVAPFGARSYWKYACSKTGEEMPAVEDDNVWIKLGDLLKELPAGALVITYGKDGPSDDDEGLSDGVSVEYQSD 319  
 NP\_078656 -----EKIITODTALYIDNTI-----INPAHWSDCVKYYIASLENIDELFGCEEYKAYCV----- 244  
 AAP74205 -----EKVTODTFCLYIDNTTTRQWEDVYV---RYYKAPLLTDADV-----GEGFKDYAGVA----- 239  
 NP\_048749 -----NACTENYGVVLDNTK-----LSNDPQDCVHFHAKMRDNFMKMGHRAFWKFSKRRKDDSDDEADNGVRLIKSKDSKR----- 258  
 NP\_077388 -----IKNYSFGFPSSALIEVVKDIL-----NHARLNSKYSWLYINVVP---SESFWSYSPSDQVPMFNLQTLFYNSCLIRVFRKRSOTQMQYIKKINAIIFYFE----- 321
